# Supplementary material for: Does Insect Aversion Lead to Increased Household Pesticide Use?
Source: MDPI journal article supplement (doi:10.3390/insects13060555), 2022-06-18
Supplement: s1 [file s1]

Supplementary Table S1: List of household pesticide products found in participants' homes

| Category                                                            | Mode of use                   | Brand name | Product name | Active ingredients       | Pesticide family |
|---------------------------------------------------------------------|-------------------------------|------------|--------------|--------------------------|------------------|
| Insecticide (for treating crawling insects)                         | Aerosol                       | Sano       | K-300        | Lambda-cyhalothrin 0.03% | Pyrethroid       |
|                                                                     |                               |            |              | Prallethrin 0.1%         | Pyrethroid       |
|                                                                     |                               |            |              | Piperonyl butoxide 1.0%  | Synergist        |
| Insecticide (for treating crawling insects and flying insects)      | Aerosol                       | Sano       | Rav Kotel K  | Deltamethrin 0.02%       | Pyrethroid       |
|                                                                     |                               |            |              | S- bioallethrin 0.2%     | Pyrethroid       |
|                                                                     |                               |            |              | Piperonyl butoxide 1.0%  | Synergist        |
| Insecticide (for treating crawling insects)<br>Slow release formula | Microcapsulated, liquid spray | Sano       | K-2000       | Cyphenothrin 0.3%        | Pyrethroid       |
| Insecticide (for treating flying insects)                           | Aerosol                       | Sano       | K-400        | Tetramethrin 0.65%       | Pyrethroid       |
|                                                                     |                               |            |              | Piperonyl butoxide 0.6%  | Synergist        |
|                                                                     |                               |            |              | MGK 264 1.0%             | Synergist        |
| Insecticide (for treating crawling insects)                         | Aerosol                       | Sano       | K-500        | Lambda-cyhalothrin 0.03% | Pyrethroid       |
|                                                                     |                               |            |              | Prallethrin 0.1%         | Pyrethroid       |
|                                                                     |                               |            |              | Piperonyl butoxide 1.0%  | Synergist        |
| Insecticide (for treating crawling insects)                         | Liquid spray                  | Sano       | K-333        | Bifenthrin 0.096%        | Pyrethroid       |
| Insecticide (for treating crawling insects)                         | Aerosol                       | Raid       | Ant killer   | Imiprothrin 0.1%         | Pyrethroid       |
|                                                                     |                               |            |              | Cypermethrin 0.1%        | Pyrethroid       |
| Insecticide (for treating crawling insects)                         | Liquid spray                  | RPC        | Excelent     | Bifenthrin 0.096%        | Pyrethroid       |

|                                                                            |                                |        |         |                                |                                  |
|----------------------------------------------------------------------------|--------------------------------|--------|---------|--------------------------------|----------------------------------|
| Insecticide<br>(for treating<br>crawling<br>insects and<br>flying insects) | Solution, for<br>exterminators | Dor.Ky | Flyco 2 | Permethrin<br>20.0%            | Pyrethroid                       |
|                                                                            |                                |        |         | Piperonyl<br>butoxide<br>10.0% | Synergist                        |
|                                                                            |                                |        |         | D-limonene<br>3.5%,            | Botanical<br>insecticide         |
|                                                                            |                                |        |         | Citronella oil<br>3.5%,        | Botanical<br>insect<br>repellent |
| Insecticide<br>(for treating<br>flying insects)                            | Aerosol                        | Sano   | Paztox  | Esbiothrin<br>0.12%            | Pyrethroid                       |
|                                                                            |                                |        |         | Tetramethrin<br>0.05%          | Pyrethroid                       |
|                                                                            |                                |        |         | Phenothrin<br>0.1%             | Pyrethroid                       |
|                                                                            |                                |        |         | Piperonyl<br>butoxide<br>0.15% | Synergist                        |
|                                                                            |                                |        |         | MGK 264<br>0.45%               | Synergist                        |
